# Supplementary material
Source: PubMed Central journal article supplement (PMC2675723)
Supplement: pp.109.136531_1.pdf [file pp.109.136531_1.pdf]

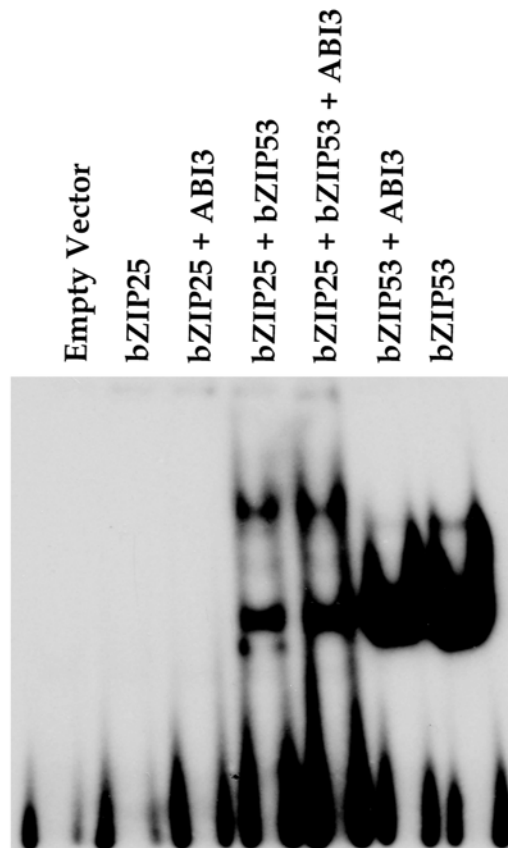

Supplemental Figure S1

Binding of bZIP25 and bZIP53 proteins to the ABRE2-3 sequence of the *SDH2-3* promoter. EMSA of the ABRE2-3 probe with protein extracts containing bZIP25, bZIP53 or both. Control was performed with an extract from bacterial cells transformed with the empty pET23a vector. As shown in Figure 6, no retardation was observed with bZIP25. However, retardation in the presence of bZIP53 and bZIP25 suggests binding of heterodimers. Concentrations of bZIP53 and bZIP25 proteins in extracts were determined by Western blot with the antibody against the T7 tag. The addition of extracts containing ABI3 did not affect bZIP protein binding. Similar results were obtained with bZIP10.
