# Supplementary material
Source: PubMed Central journal article supplement (PMC2675723)
Supplement: pp.109.136531_2.pdf [file pp.109.136531_2.pdf]

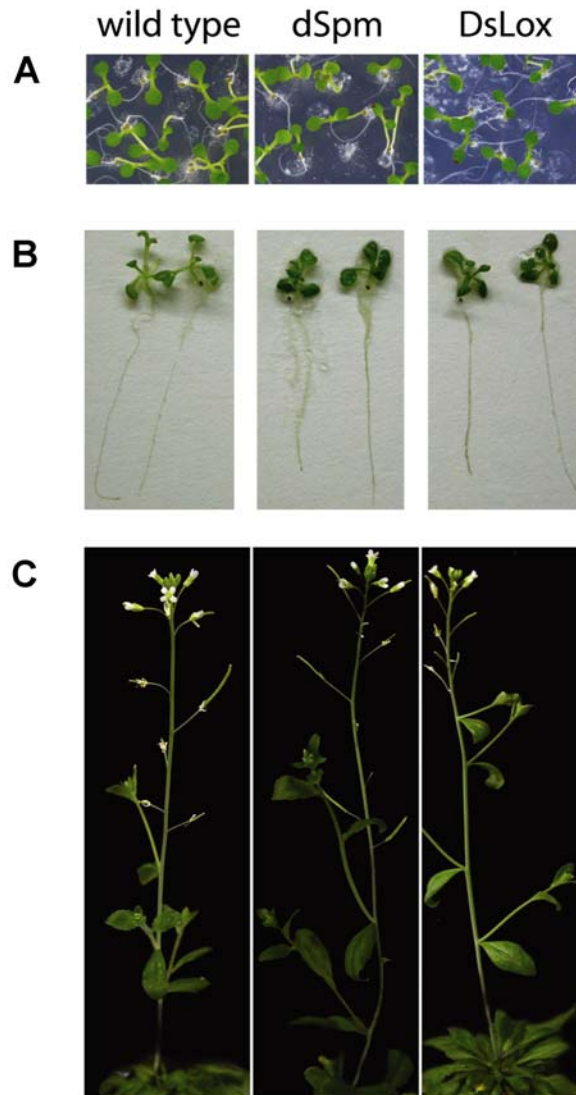

Supplemental Figure S2

*SDH2-3* is not essential for Arabidopsis growth and development. A, Seven day-old wild type and homozygous mutant seedlings were grown on 0.5xMS. B, Ten day-old wild type and homozygous mutant seedlings were grown on 0.5xMS, 1% (w/v) sucrose. C, Fifty day-old wild type and homozygous mutant seedlings were grown hydroponically as described in Experimental procedures.
