# Supplementary material
Source: PubMed Central journal article supplement (PMC2675723)
Supplement: pp.109.136531_3.pdf [file pp.109.136531_3.pdf]

**Supplemental Table 1. List of oligonucleotides**

| Name          | Sequence (5'→ 3')                            | Description                       |
|---------------|----------------------------------------------|-----------------------------------|
| SDH2-3F       | TTGGATCCTTGACTTTTCTGTTGC                     | site <i>Bam</i> HI underlined     |
| RYmR          | TGCAGGAGAGAGATATGGCTAGCGAAATGACACGT          | mutated nucleotides in bold       |
| SDH2-3R       | ATTCCATGGTCTGTTTCGCTTGATC                    | site <i>Nco</i> I underlined      |
| RYmF          | ACGTGTCATTTCCGCTAGCCATATCTCTCTCCTGCA         | mutated nucleotides in bold       |
| ABRE1mF       | CTCTAGGCTGTCCCTTCACTCATTTCATGC               | mutated nucleotides in bold       |
| ABRE1mR       | GCATGGAAATGAGGTGAAGGACAGCCTAGAG              | mutated nucleotides in bold       |
| ABRE2mF       | CACGTAGTCGCACCTTCACTCCATTGACTACAG            | mutated nucleotides in bold       |
| ABRE2mR       | CTGTAGTCAATGGGTGAAGTGC GACTACGTG             | mutated nucleotides in bold       |
| ABRE3mF       | GCATTGTAACCTTCACTCCACGCACACGTGCCA            | mutated nucleotides in bold       |
| ABRE3mR       | TGGCACGTGTGCGTGGTGAAGTTACAATGC               | mutated nucleotides in bold       |
| 3XABREmF      | GCATTGTAACCTTCACTCCACGCACCTTCACTCCA          | mutated nucleotides in bold       |
| 3XABREmR      | TGGGTGAAGTGC GCTGGTGAAGTTACAATGC             | mutated nucleotides in bold       |
| BastaF        | GCGGTCTGCACCATCGTCA                          |                                   |
| BastaR        | ATCTCGGTGACGGGCAGGAC                         |                                   |
| sdh2-58       | GAGAGGCTACAGGCAATAACTGAG                     |                                   |
| sdh2-63       | AGTTTTAAACATTGATTCTTATTG                     |                                   |
| At2S3F        | TCCCTCCTTACTACTAGAGTCCAAGC                   |                                   |
| At2S3R        | CCTCTCATTTATTACGGTGTAGTGCT                   |                                   |
| 18SF          | GACGGAGAATTAGGGTTTCGATTC                     |                                   |
| 18SR          | CCAATAAGAACGGCCATGCAC                        |                                   |
| sdh2-57       | CGCGAACACCGGCAATCACCA                        |                                   |
| sdh2-50       | TGGAATCCTGACAAGCCTAACTCTA                    |                                   |
| sdh2-51       | CGGTCCAAGTCATGTTGAAG                         |                                   |
| Em1F          | GTGATAGTAGTTACGAGCTAC                        |                                   |
| Em1R          | CGGCAACCGCATTACATAAC                         |                                   |
| actinF        | GCTATGTATGTCGCCATTCAAGC                      |                                   |
| actinR        | CATCATATTCTGCCTTTGC(A/G)ATCC                 |                                   |
| RY1           | TCATTTCCATGCACATGTCTC                        | RY element in bold                |
| RY2           | GCAGGAGAGAGACATGTGCATG                       | RY element in bold                |
| RYm1          | TCATTTCCGCTAGCCATGTCTC                       | RY mutated nucleotides underlined |
| RYm2          | GCAGGAGAGAGACATGGCTAGC                       | RY mutated nucleotides underlined |
| ABRE2-3a      | CATTGTAACACGTAGTCGCACACGTG                   | ABRE elements in bold             |
| ABRE2-3b      | AGTCAATGGCACGTGTGCGACTACGTG                  | ABRE elements in bold             |
| ABRE2m-3m F   | CATTGTAATTCACCACCGCACTTCACTCAC               | mutated ABRE elements underlined  |
| ABRE2m-3mR    | AGTCAATGGGTGAAGTGC GGTGGTGAAG                | mutated ABRE elements underlined  |
| ABRE2-ABRE3 F | CATTGTAACACGTAGTCGCACACGTGCCATTGACT          | ABRE elements in bold             |
| ABRE2-ABRE3 R | AGTCAATGGCACGTGTGCGACTACGTGTTACAATG          | ABRE elements in bold             |
| ABRE1-RY F    | AGGCTGTCCACGTGTTCATTTCCATGCACATGTCTCTCCTGC   | ABRE and RY elements in bold      |
| ABRE1-RY R    | GCAGGAGAGAGACATGTGCATGGAAATGACACGTG GACAGCCT | ABRE and RY elements in bold      |

dspm3'  
LBW

CTTATTTTCAGTAAGAGTGTGGGGTTTTGG  
AACGTCCGCAATGTGTTATTAAGTTGTC

---
